# Supplementary material
Source: PubMed Central journal article supplement (PMC7721284)
Supplement: NIHMS1057743-supplement-Supplemental_Figures___Tables.pdf [file NIHMS1057743-supplement-Supplemental_Figures___Tables.pdf]

Supplementary Information –

# Mapping the Populations of Neurotensin Neurons in the Male Mouse Brain

Laura E. Schroeder<sup>1</sup>, Ryan Furdock<sup>1</sup>, Cristina Rivera Quiles, Gizem Kurt, Patricia Perez-Bonilla<sup>1</sup>, Angela Garcia<sup>1</sup>, Crystal Colon-Ortiz<sup>1</sup>, Juliette Brown<sup>1</sup>, Raluca Bugescu<sup>1</sup>, and Gina M. Leininger<sup>1,2</sup>

<sup>1</sup>Department of Physiology, Michigan State University, East Lansing, MI 48114

## Supplementary Figure 1

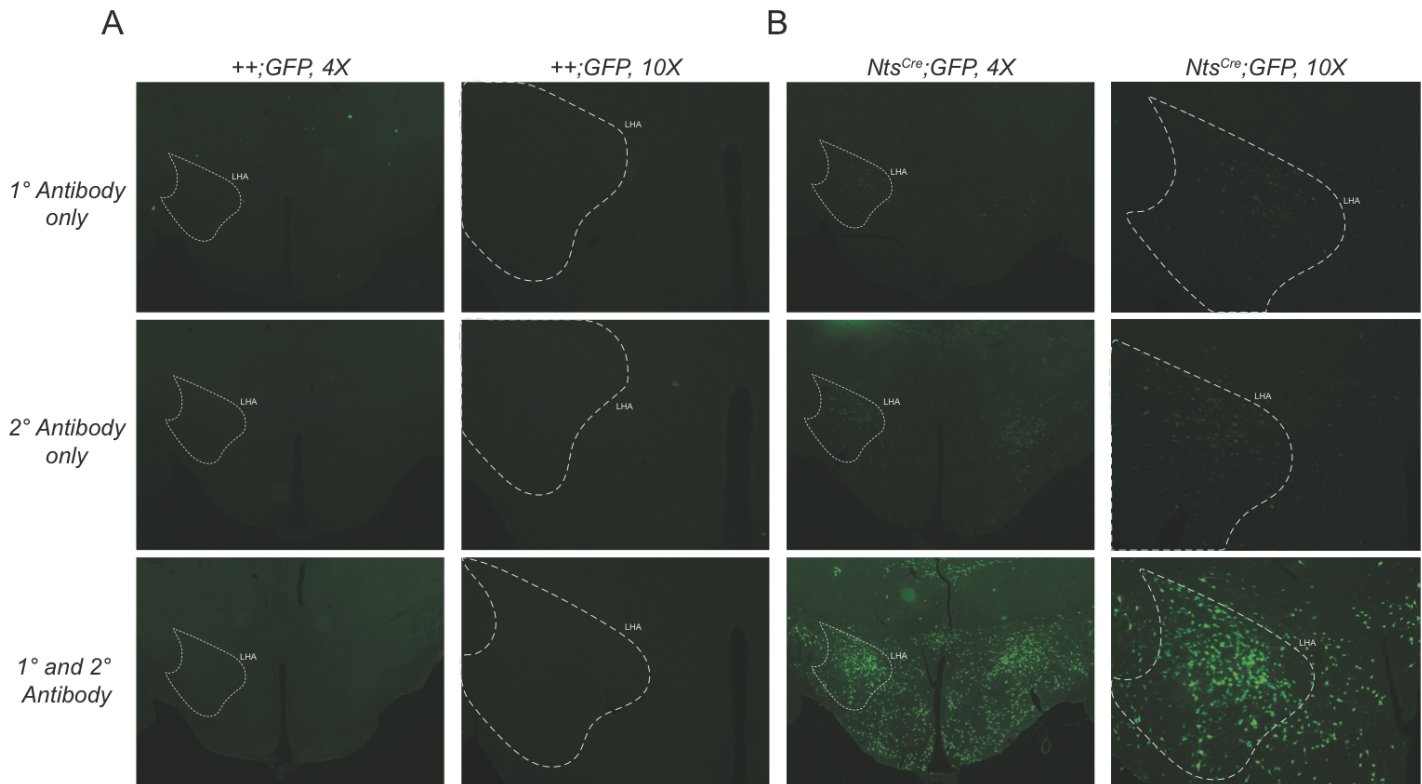

### Supplementary Figure 1: Negative and Positive controls for 1° and 2° Antibodies used to detect GFP.

Coronal images of the mouse brain at the level of the lateral hypothalamic area (LHA), a region known to contain Nts-expressing neurons. The dashed line area indicates the LHA. Each row includes a 4x image of the LHA on the left and a 10x image of the same LHA section on the right. **A)** Analysis of a mouse that is heterozygous for the *GFP* allele but lacks Cre recombinase ( $++;GFP$ ). Separate series of brain sections were exposed to only the primary (1°) antibody for GFP (top images), only the secondary (2°) antibody (Alexa-488; middle images), or both the 1° and 2° antibodies; none of these conditions yielded any GFP signal. These data confirm that the GFP reporter line used in this study is not “leaky” and that no GFP is expressed in the absence of Cre-mediated recombination.

**B)** Analysis of a mouse that is heterozygous for both the *Nts<sup>Cre</sup>* and *GFP* alleles (*Nts<sup>Cre</sup>;GFP*), identical to those used in this study to map Nts-GFP neurons. Separate series of brain sections were exposed to only the primary (1°) antibody for GFP (top images) or only with the secondary (2°) antibody (Alexa-488; middle images). A modest amount of GFP cells can be detected within the LHA under these conditions, as is expected due to the endogenous GFP expression in this line. However, exposure to both the 1° GFP antibody followed by the secondary 2° Alexa-488 conjugated antibody considerably enhances the detection of GFP neurons within these brains, permitting easy determination of their location throughout the brain.

## Supplementary Figure 2

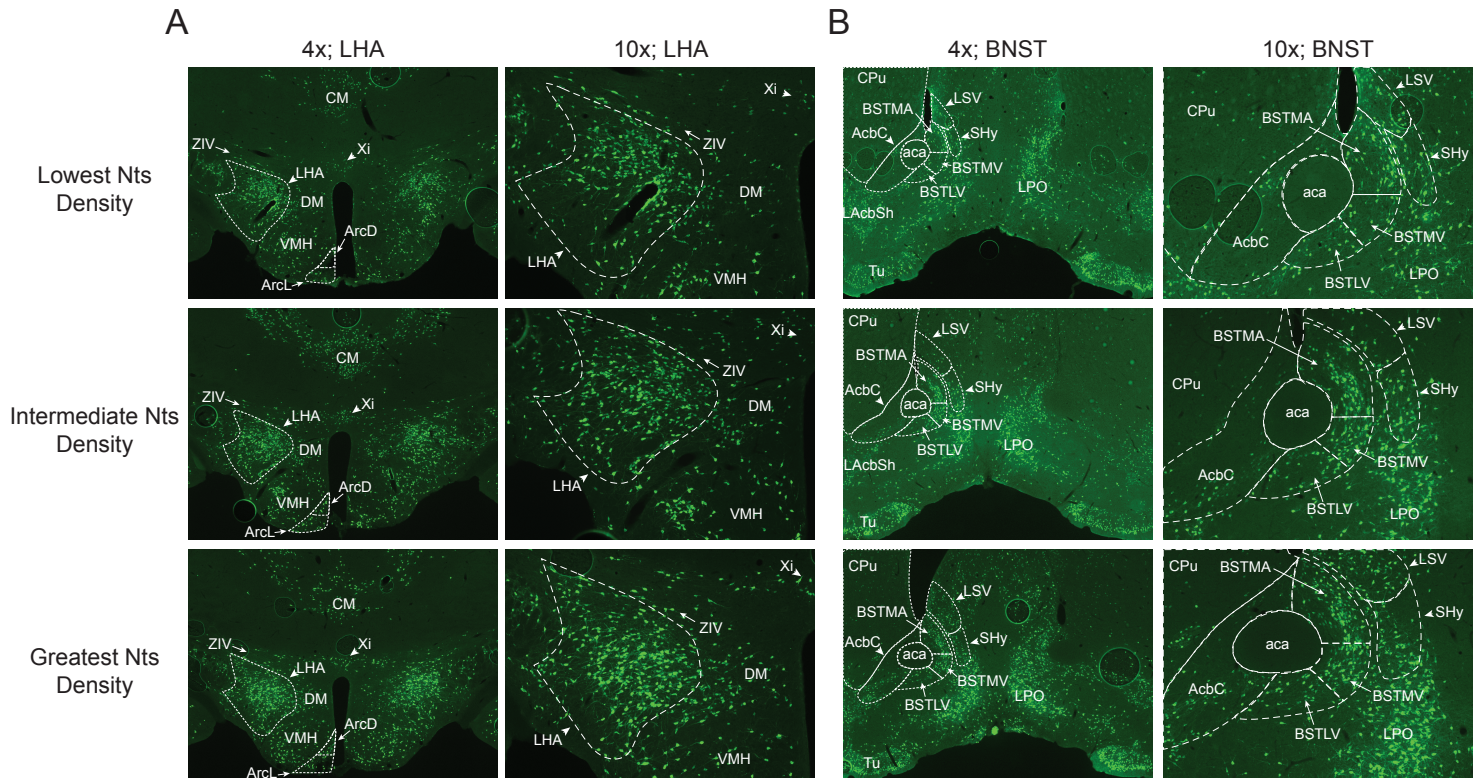

**Supplementary Figure 2. Variability between brains of *Nts<sup>Cre</sup>;GFP* mice.** Images provide examples of the natural variation found amongst brains from the three *Nts<sup>Cre</sup>;GFP* mice assessed in this study. For each representative area and each brain assessed, a 4x image of Nts-GFP neurons is included on the left and a 10x image of the same structure is included on the right. From top to bottom, images show a representative region from the brain sample with the lowest density of Nts-GFP neurons, the brain with an intermediate density of Nts-GFP neurons, and the brain with the greatest density of Nts-GFP neurons. **A)** Images show natural variation in densities of LHA Nts-GFP populations (bregma -1.82) between brains of three *Nts<sup>Cre</sup>;GFP* mice. A density rating of ++++ was determined for LHA Nts neurons at bregma coordinate -1.82, and this rating was derived from the brain with the intermediate density of LHA Nts neurons. **B)** Images show natural variation in densities of BNST Nts-GFP populations (bregma 0.50). A density rating of ++/+++ was determined for the BSTMV and BSTMA whereas a density rating of +/++ was determined for the BSTLV, and this rating was derived from the brain with the intermediate density of LHA Nts neurons.

**Supplemental Table 1: Relative Density of Nts-GFP Neurons and Nts-ISH in the Mouse Brain.** Caudal to rostral list of brain regions observed to contain Nts-GFP neurons and the Bregma coordinates at which they were found. The relative density of Nts-ISH was assessed in each of these regions from the publicly accessible Allen Brain dataset of coronal Nts-ISH images, and their corresponding Bregma coordinates are given (Lein et al., 2007) (© 2004 Allen Institute for Brain Science. Allen Mouse Brain Atlas. Available from: mouse.brain-map.org). Relative density ratings: +++++ = Very dense distribution of soma that nearly overlap; ; ++++/++++ = dense distribution of soma but no overlap; +++ = Numerous distributed soma; ++/+++ = Intermediate; ++ = Moderate density of soma; +/++ = Some scattered soma; + = Sparse soma; 0/+ = Very few if any soma noted.

See Pages 5 - 17

| Abbreviation | Structure                                                | Relative Density of Nts-GFP Cells | Relative Density of Nts-ISH Cells (Allen Brain) |
|--------------|----------------------------------------------------------|-----------------------------------|-------------------------------------------------|
| SolC         | Solitary nucleus, commissural part                       | + / ++                            | +                                               |
| Rob          | Raphe obscurus nucleus                                   | +                                 | 0 / +                                           |
| Ramb         | Retroambiguus nucleus                                    | ++                                | + / ++                                          |
| Sp5C         | Spinal trigeminal tract, caudal part                     | +++ / +++++                       | +++ / +++++                                     |
| Irt          | Intermediate reticular nucleus                           | ++                                | +                                               |
| MdD          | Medullary reticular nucleus, dorsal part                 | + / ++                            | 0 / +                                           |
| MdV          | Medullary reticular nucleus, ventral part                | ++                                | 0 / +                                           |
| 10N          | Dorsal motor nucleus of vagus                            | + / ++                            | ++++                                            |
| 12N          | Hypoglossal nucleus                                      | ++++                              | ++++                                            |
| Gr           | Gracile nucleus                                          | ++ / +++                          | ++ / +++                                        |
| IOA/IOB      | Inferior olive, subnucleus A and B of the medial nucleus | +++                               | 0 / +                                           |
| CuR          | Cuneate nucleus, rotundus part                           | +++                               | ++ / +++                                        |
| SolCL        | Solitary nucleus, ventrolateral part                     | +                                 | +                                               |
| CeCv         | Central cervical nucleus of the spinal cord              | +                                 | +                                               |
| SolM         | Solitary nucleus, medial part                            | ++                                | + / ++                                          |
| SolC/SolIM   | Solitary nucleus, ventral part and intermediate part     | ++                                | + / ++                                          |
| Cu/cu        | Cuneate nucleus and fasciculus                           | +++                               | +++                                             |
| SolDL        | Solitary nucleus, dorsolateral part                      | ++                                | +                                               |
| SubP         | Subpostrema area                                         | +                                 | 0 / +                                           |
| IOPr         | Ambiguus nucleus                                         | +                                 | ++ / +++                                        |
| SolI         | Solitary nucleus, interstitial part                      | +                                 | + / ++                                          |
| Sp5I         | Spinal trigeminal nucleus, interpolar part               | +++                               | +                                               |
| Mx           | Matrix region of the medulla                             | +                                 | +                                               |
| SolCe        | Solitary nucleus, central part                           | + / ++                            | +                                               |
| AP           | Area postrema                                            | ++ / +++                          | ++ / +++                                        |
| IOC          | Inferior olive, subnucleus C of medial nucleus           | ++ / +++                          | 0 / +                                           |
| IOD          | Inferior olive, dorsal nucleus                           | ++ / +++                          | 0                                               |
| IOPr         | Inferior olive, principal nucleus                        | +                                 | 0                                               |

| Abbreviation | Structure                                       | Relative Density of Nts-GFP Cells | Relative Density of Nts-ISH Cells (Allen Brain) |
|--------------|-------------------------------------------------|-----------------------------------|-------------------------------------------------|
| Rpa          | Raphe pallidus nucleus                          | +                                 | 0                                               |
| Lrt          | Lateral reticular nucleus                       | 0/+                               | 0/+                                             |
| RVRG         | Rostral ventral respiratory group               | +                                 | 0                                               |
| CVL          | Caudoventrolateral reticular nucleus            | +                                 | 0                                               |
| Ro           | Nucleus of Roller                               | 0/+                               | 0/+                                             |
| PCRt         | Parvicellular reticular nucleus                 | + / ++                            | +                                               |
| SolG         | Solitary nucleus, gelatinous part               | 0/+                               | 0/+                                             |
| Mve          | Medial vestibular nucleus                       | + / ++                            | +                                               |
| SpVe         | Spinal vestibular nucleus                       | + / ++                            | + / ++                                          |
| Gi           | Gigantocellular reticular nucleus               | 0/+                               | 0/+                                             |
| SolDM        | Solitary nucleus, dorsomedial part              | +                                 | +                                               |
| IODM         | Inferior olive, dorsomedial cell group          | + / ++                            | 0                                               |
| SolL         | Solitary nucleus, lateral part                  | +                                 | +                                               |
| 5Sol         | Trigeminal-solitary transition zone             | +                                 | + / ++                                          |
| Pr           | Prepositus nucleus                              | 0/+                               | 0/+                                             |
| GiV          | Gigantocellular reticular nucleus, ventral part | +                                 | 0/+                                             |
| DPGi         | Dorsal paragigantocellular nucleus              | 0/+                               | 0/+                                             |
| LPGi         | Lateral paragigantocellular nucleus             | 0/+                               | 0/+                                             |
| IOM          | Inferior olive, medial nucleus                  | ++                                | +                                               |
| Fve          | F cell group of the vestibular complex          | +                                 | 0                                               |
| Bo           | Botzinger complex                               | 0/+                               | 0                                               |
| RVL          | Rostroventrolateral reticular nucleus           | 0/+                               | 0                                               |
| MVeMC        | Medial vestibular nucleus, magnocellular part   | +                                 | +                                               |
| DMSp5        | Dorsomedial spinal trigeminal nucleus           | + / ++                            | ++ / +++                                        |
| DC           | Dorsal cochlear nucleus                         | ++                                | ++                                              |
| GiA          | Gigantocellular reticular nucleus, alpha part   | +                                 | 0/+                                             |
| IS           | Inferior salivatory nucleus                     | +                                 | 0                                               |
| X            | nucleus X                                       | 0/+                               | 0/+                                             |
| Y            | nucleus Y                                       | 0/+                               | +                                               |

| Abbreviation               | Structure                                                        | Relative Density of Nts-GFP Cells | Relative Density of Nts-ISH Cells (Allen Brain) |
|----------------------------|------------------------------------------------------------------|-----------------------------------|-------------------------------------------------|
| PCRtA                      | Parvicellular reticular nucleus, alpha part                      | + / ++                            | + / ++                                          |
| Lve                        | Lateral vestibular nucleus                                       | 0 / +                             | 0 / +                                           |
| DCFu                       | Dorsal cochlear nucleus, fusiform layer                          | +++ / +++++                       | +++ / +++++                                     |
| RMg                        | Raphe magnus nucleus                                             | 0 / +                             | 0 / +                                           |
| DCDp                       | Dorsal cochlear nucleus, deep layer                              | ++                                | +                                               |
| VeCb                       | Vestibulocerebellar nucleus                                      | 0 / +                             | 0 / +                                           |
| 7VM, 7DM, 7DI, 7DL, 7L 7VI | Facial nucleus subnuclei                                         | +++                               | + / ++                                          |
| SuVe                       | Superior vestibular nucleus                                      | ++                                | +                                               |
| Sp5O                       | Spinal trigeminal nucleus, oral part                             | + / ++                            | +                                               |
| MVePC                      | Medial vestibular nucleus, parvicellular part                    | ++ / +++                          | ++ / +++                                        |
| Sge                        | Supragenual nucleus                                              | 0 / +                             | 0 / +                                           |
| 7N                         | Facial nucleus                                                   | +++ / +++++                       | +++ / +++++                                     |
| 6N                         | Abducens nucleus                                                 | +                                 | 0                                               |
| Pa6                        | Paraabducens nucleus                                             | +                                 | 0 / +                                           |
| 6RB                        | Abducens nucleus, retractor bulbi part                           | ++ / +++                          | +++ / +++++                                     |
| GrC                        | Granule cell layer of cochlear nuclei                            | ++                                | +                                               |
| P7                         | Perifacial zone                                                  | + / ++                            | 0                                               |
| LC                         | Locus coeruleus                                                  | +                                 | 0                                               |
| A5                         | A5 noradrenaline cells                                           | +++ / +++++                       | +++ / +++++                                     |
| Eve                        | Nucleus of origin of the efferent fibers of the vestibular nerve | +                                 | 0                                               |
| VCA                        | Ventral cochlear nucleus, anterior part                          | +++                               | 0                                               |
| SPO                        | Superior paraolivary nucleus                                     | +                                 | 0 / +                                           |
| PR5DM                      | Principal sensory trigeminal nucleus, dorsomedial part           | +                                 | 0                                               |
| MPBE                       | Medial parabrachial nucleus, external part                       | + / ++                            | + / ++                                          |
| PnR                        | Pontine raphe nucleus                                            | +                                 | 0 / +                                           |
| CGA                        | Central gray, alpha part                                         | + / ++                            | +                                               |
| CGB                        | Central gray, beta part                                          | 0 / +                             | +                                               |
| LPBD                       | Lateral parabrachial nucleus, dorsal part                        | +++ / +++++                       | 0 / +                                           |
| LPBE                       | Lateral parabrachial nucleus, external part                      | +++ / +++++                       | +++ / +++++                                     |

| Abbreviation       | Structure                                                                | Relative Density of Nts-GFP Cells | Relative Density of Nts-ISH Cells (Allen Brain) |
|--------------------|--------------------------------------------------------------------------|-----------------------------------|-------------------------------------------------|
| 5Tr                | Trigeminal transition zone                                               | 0/+                               | 0                                               |
| DTgC               | Dorsal tegmental nucleus, central part                                   | +                                 | 0                                               |
| DTgP               | Dorsal tegmental nucleus, pericentral part                               | +                                 | 0                                               |
| LPBI / LPBV / LPBS | Lateral parabrachial nucleus, internal part/ ventral part/ superior part | +                                 | 0/+                                             |
| LPBC               | Lateral parabrachial nucleus, central part                               | +++ /++++                         | +++ /++++                                       |
| LDTgV              | Laterodorsal tegmental nucleus, ventral part                             | + /++                             | ++ /+++                                         |
| SubCD              | Subcoeruleus nucleus, dorsal part                                        | +                                 | +                                               |
| 5ADi               | Motor trigeminal nucleus, anterior digastric part                        | ++                                | 0/+                                             |
| CnF                | Cuneiform nucleus                                                        | +++ /++++                         | ++ /+++                                         |
| KF                 | Koelliker-fuse nucleus                                                   | +++ /++++                         | ++++                                            |
| Su5                | Supratrigeminal nucleus                                                  | ++ /+++                           | +                                               |
| 5N                 | Motor trigeminal nucleus                                                 | ++                                | ++                                              |
| CIC                | Central nucleus of the inferior colliculus                               | 0/+                               | 0/+                                             |
| PR5VL              | Principal sensory trigeminal nucleus, ventrolateral part                 | +++ /++++                         | 0                                               |
| MPG                | Medial parabrachial nucleus                                              | +++                               | +++                                             |
| LDTg               | Laterodorsal tegmental nucleus                                           | ++ /+++                           | +++                                             |
| PnC                | Pontine reticular nucleus, caudal part                                   | + /++                             | 0/+                                             |
| Sag                | Sagulum nucleus                                                          | +++ /++++                         | +                                               |
| DMTg               | Dorsomedial tegmental area                                               | + /++                             | 0/+                                             |
| DCIC               | Dorsal cortex of the inferior colliculus                                 | ++ /+++                           | 0/+                                             |
| ECIC               | External cortex of the inferior colliculus                               | + /++                             | 0/+                                             |
| 5TT                | Motor trigeminal nucleus, tensor tympani part                            | +                                 | +                                               |
| DRC                | Dorsal raphe nucleus, caudal part                                        | ++ /+++                           | + /++                                           |
| SubCV              | Subcoeruleus nucleus, ventral part                                       | + /++                             | ++                                              |
| cic                | Commissure of inferior colliculus                                        | 0/+                               | 0                                               |
| PR5                | Principal sensory trigeminal nucleus                                     | ++++                              | 0                                               |
| DRD                | Dorsal raphe nucleus, dorsal part                                        | ++++                              | ++++                                            |
| Tz                 | Nucleus of the trapezoid body                                            | +                                 | 0                                               |
| LPAG               | Lateral periaqueductal gray                                              | +++ /++++                         | + /++                                           |



| Abbreviation | Structure                                           | Relative Density of Nts-GFP Cells | Relative Density of Nts-ISH Cells (Allen Brain) |
|--------------|-----------------------------------------------------|-----------------------------------|-------------------------------------------------|
| VLPAG        | Ventrolateral periaqueductal gray                   | +++ /++++                         | +++ /++++                                       |
| DMPAG        | Dorsomedial periaqueductal gray                     | +++ /++++                         | 0                                               |
| P5           | Peritrigeminal zone                                 | ++                                | +                                               |
| DLL          | Dorsal nucleus of the lateral lemniscus             | ++                                | ++                                              |
| DRI          | Dorsal raphe nucleus, interfascicular part          | +++                               | +++ /++++                                       |
| DLPAG        | Dorsolateral periaqueductal gray                    | +++ /++++                         | 0                                               |
| DpGi         | Deep gray layer of the superior colliculus          | +++ /++++                         | +                                               |
| DpWh         | Deep white layer of the superior colliculus         | +++ /++++                         | 0/+                                             |
| TrLL         | Triangular nucleus, lateral lemniscus               | +                                 | 0                                               |
| DRV          | Dorsal raphe nucleus, ventral part                  | +++                               | ++++                                            |
| CAT          | Nucleus of the central acoustic tract               | +                                 | 0                                               |
| MPL          | Medial paralemniscial nucleus                       | +                                 | 0                                               |
| PDR          | Posterodorsal raphe nucleus                         | ++                                | ++                                              |
| PrCnF        | Precuneiform area                                   | +++ /++++                         | ++ /+++                                         |
| PMnR         | Paramedian raphe nucleus                            | +                                 | 0/+                                             |
| PLV          | Perilemniscial nucleus, ventral part                | +                                 | 0                                               |
| ll           | Lateral lemniscus                                   | +++                               | ++ /+++                                         |
| Pa4          | Paratrochlear nucleus                               | 0/+                               | 0/+                                             |
| VLL          | Ventral nucleus of the lateral lemniscus            | +                                 | 0                                               |
| SuG          | Superficial gray layer of the superior colliculus   | 0/+                               | 0                                               |
| DRL          | Dorsal raphe nucleus, lateral part                  | ++ /+++                           | ++                                              |
| SPTg         | Subpeduncular tegmental nucleus                     | ++ /+++                           | + /++                                           |
| ILL          | Intermediate nucleus of the lateral lemniscus       | 0/+                               | 0                                               |
| InG          | Intermediate gray layer of the superior colliculus  | ++ /+++                           | +                                               |
| InWh         | Intermediate white layer of the superior colliculus | ++ /+++                           | 0/+                                             |
| MiTg         | Microcellular tegmental nucleus                     | +++ /++++                         | ++ /+++                                         |
| PBG          | Parabigeminal nucleus                               | +++ /++++                         | +                                               |
| PTg          | Pedunculotegmental nucleus                          | ++                                | ++                                              |
| PnO          | Pontine reticular nucleus, oral part                | + /++                             | + /++                                           |

| Abbreviation | Structure                                                 | Relative Density of Nts-GFP Cells | Relative Density of Nts- ISH Cells (Allen Brain) |
|--------------|-----------------------------------------------------------|-----------------------------------|--------------------------------------------------|
| Cli          | Caudal linear nucleus of the raphe                        | 0/+                               | 0/+                                              |
| 3N           | Oculomotor nucleus                                        | ++/+++                            | 0/+                                              |
| Su3C         | Supraoculomotor cap                                       | ++/+++                            | +/>++                                            |
| Su3C         | Supraoculomotor periaqueductal gray                       | ++/+++                            | +/>++                                            |
| 3PC          | Oculomotor nucleus, parvicellular part                    | ++/+++                            | +                                                |
| STr/S        | Subiculum Transition Area/ Subiculum                      | ++++                              | ++++                                             |
| Ment         | Medial Entorhinal Cortex                                  | +/>++                             | ++                                               |
| Cent         | Caudomedial Entorhinal Cortex                             | ++                                | ++                                               |
| PRh          | Perirhinal Cortex                                         | +/>++                             | 0                                                |
| PnO          | Pontine Reticular nucleus, Oral part                      | +                                 | 0                                                |
| rs           | Rubrospinal tract                                         | ++                                | 0/+                                              |
| VIEnt        | Ventral Intermediate Entorhinal Cortex                    | +/>++                             | +++                                              |
| DLEnt/Lent   | Dorsolateral/Lateral Entorhinal Cortex                    | +/>++                             | ++                                               |
| SubB         | Subbrachial nucleus                                       | +++/>++++                         | +++/>++++                                        |
| MnR          | Median raphe nucleus                                      | +/>++                             | 0/+                                              |
| mRt          | Mesencephalic reticular formation                         | ++/+++                            | +/>++                                            |
| Op           | Optic nerve layer of the superior colliculus              | ++                                | 0/+                                              |
| EW           | Edinger-westphal nucleus                                  | +                                 | 0/+                                              |
| mIf          | Medial longitudinal fasciculus                            | +/>++                             | +                                                |
| PIF          | Parainterfascicular nucleus of the Ventral Tegmental Area | 0/+                               | 0                                                |
| PN           | Paranigral nucleus of the Ventral Tegmental Area          | 0/+                               | 0                                                |
| RSG/RSD      | Retrosplenial Granular/Dysgranular Cortex                 | ++++                              | 0                                                |
| RRF          | Retrorubral field                                         | ++                                | ++                                               |
| PaR          | Pararubral nucleus                                        | +                                 | 0                                                |
| IPR          | Interpeduncular nucleus, rostral subnucleus               | +                                 | 0                                                |
| mRt          | Mesencephalic Reticular Formation                         | +/>++                             | 0/+                                              |
| IPDM         | Interpeduncular nucleus, dorsomedial subnucleus           | 0/+                               | 0                                                |
| DpGi         | Deep Gray Layer of the Superior Colliculus                | ++/+++                            | 0                                                |
| IPDL         | Interpeduncular nucleus, dorsolateral subnucleus          | 0/+                               | 0                                                |

| Abbreviation | Structure                                          | Relative Density of Nts-GFP Cells | Relative Density of Nts- ISH Cells (Allen Brain) |
|--------------|----------------------------------------------------|-----------------------------------|--------------------------------------------------|
| IPDM         | Interpeduncular nucleus, dorsomedial subnucleus    | 0/+                               | 0                                                |
| IPC          | Interpeduncular nucleus, caudal subnucleus         | 0/+                               | 0                                                |
| IPI          | Interpeduncular nucleus, intermediate subnucleus   | 0/+                               | 0                                                |
| IPL          | Interpeduncular nucleus, lateral subnucleus        | 0/+                               | 0                                                |
| MA3          | Medial accessory oculomotor nucleus                | +                                 | 0/+                                              |
| DpWh         | Deep White Layer of the Superior Colliculus        | ++                                | 0                                                |
| DS           | Dorsal Subiculum                                   | ++++                              | ++++                                             |
| VS           | Ventral Subiculum                                  | ++++                              | ++++                                             |
| BIC          | nucleus of the Brachium of the Inferior Colliculus | +++ /++++                         | +++ /++++                                        |
| MGV          | Medial Geniculate nucleus, Ventral part            | +++                               | 0                                                |
| InC/InCSh    | Interstitial nucleus of Cajal w/ shell region      | ++                                | 0                                                |
| Apir         | Amygdalopiriform transition area                   | ++ /+++                           | 0                                                |
| PRh          | Perirhinal cortex                                  | 0/+                               | 0                                                |
| Dk           | Nucleus of Darkschewitsch                          | +++                               | +                                                |
| bic          | Brachium of the Inferior Colliculus                | ++++                              | +++ /++++                                        |
| DIEnt        | Dorsointermedial Entorhinal Cortex                 | +                                 | + /++                                            |
| MGM          | Medial Geniculate nucleus, Medial                  | +++ /++++                         | ++ /+++                                          |
| PoT          | Posterior Thalamic nucleus, Triangular             | +++ /++++                         | +                                                |
| PIL          | Posterior Intralaminar Thalamic nucleus            | +++ /++++                         | ++ /+++                                          |
| PP           | Peripeduncular nucleus                             | +++ /++++                         | ++ /+++                                          |
| SG           | Supragenulate Thalamic nucleus                     | +++ /++++                         | ++ /+++                                          |
| PMCo         | Posteromedial cortical amygdalar nucleus           | 0/+                               | 0                                                |
| csc          | Commissure of the superior colliculus              | 0/+                               | 0                                                |
| mtg          | mammillotegmental tract                            | + /++                             | ++                                               |
| scp          | Superior cerebellar peduncle                       | +                                 | 0/+                                              |
| LT           | Lateral terminal nucleus acc optic tract           | ++                                | 0                                                |
| APT          | Anterior pretectal nucleus                         | + /++                             | 0                                                |
| ZIC          | Zona incerta, caudal                               | ++ /+++                           | 0/+                                              |
| IF           | Interfascicular nucleus                            | +                                 | 0                                                |

| Abbreviation | Structure                                                    | Relative Density of Nts-GFP Cells | Relative Density of Nts- ISH Cells (Allen Brain) |
|--------------|--------------------------------------------------------------|-----------------------------------|--------------------------------------------------|
| p1Rt         | p1 reticular formation                                       | + / ++                            | 0                                                |
| MCPC         | Magnocellular nucleus post comm                              | + / ++                            | 0                                                |
| ML           | Medial mammillary nucleus, lateral                           | +++                               | 0                                                |
| MM           | Medial mammillary nucleus, medial                            | +++ / +++++                       | ++++                                             |
| PBP          | Parabrachial pigmented nucleus of the Ventral Tegmental Area | + / ++                            | 0                                                |
| fr           | Fasciculus retroflexus                                       | +                                 | 0                                                |
| VTA          | Ventral tegmental area                                       | +                                 | 0                                                |
| Pli          | Posterior Limitans Thalamic nucleus                          | ++                                | 0                                                |
| PrEW         | Pre-edinger-westphal nucleus                                 | 0 / +                             | 0                                                |
| Reth         | Retroethmoid nucleus                                         | + / ++                            | 0 / +                                            |
| pc           | Posterior commissure                                         | 0 / +                             | 0                                                |
| LM           | Lateral mammillary nucleus                                   | +++ / +++++                       | 0                                                |
| rmx          | Retromammillary decussation                                  | + / ++                            | 0                                                |
| OPT          | Olivary pretectal nucleus                                    | 0 / +                             | 0                                                |
| Pir          | Piriform Cortex                                              | +                                 | +                                                |
| PAG          | Periaqueductal Gray                                          | +++ / +++++                       | +                                                |
| PSTh         | Parasubthalamic nucleus                                      | ++++                              | ++++                                             |
| RML          | Retromammillary nucleus, Lateral                             | ++ / +++                          | 0                                                |
| SNC/SNR      | Substantia Nigra Compacta/Reticular                          | +++                               | 0 / + (SNC), + (SNR)                             |
| LPMC         | LP Thalamic nucleus, Mediocaudal                             | ++ / +++                          | 0                                                |
| PMV          | Premammillary nucleus, Ventral                               | ++++                              | +++ / +++++                                      |
| ZID/ZIV      | Zona Incerta, Dorsal/Ventral                                 | ++                                | + / ++ (ZIV)                                     |
| Py           | Pyramidal Cell Hippocampus                                   | ++++                              | 0 / +                                            |
| LPLR         | LP Thalamic nucleus, Laterorostral                           | + / ++                            | 0                                                |
| LPMR         | LP Thalamic nucleus, Mediorostral                            | + / ++                            | 0                                                |
| APTD         | Anterior Pretectal nucleus, Dorsal                           | +                                 | 0                                                |
| STh          | Subthalamic nucleus                                          | ++++                              | ++++                                             |
| Te           | Terete hypothalamic nucleus                                  | +                                 | 0                                                |
| PR           | Prerubral Field                                              | ++ / +++                          | 0                                                |

| Abbreviation    | Structure                                                  | Relative Density of Nts-GFP Cells | Relative Density of Nts-ISH Cells (Allen Brain) |
|-----------------|------------------------------------------------------------|-----------------------------------|-------------------------------------------------|
| FF              | Fields of Forel                                            | ++/+++                            | 0                                               |
| pv              | Paraventricular fiber system                               | +++                               | +/++                                            |
| ArcLP/ArcMP     | Caudal Arcuate Hypothalamic nucleus                        | ++                                | 0                                               |
| PH              | Posterior Hypothalamic nucleus                             | +++                               | +/++                                            |
| BLP             | Basolateral Amygdalar nucleus, posterior                   | ++                                | +/++                                            |
| BMP             | Basomedial Amygdalar nucleus, posterior                    | ++                                | ++                                              |
| BLA             | Basolateral Amygdalar nucleus, Anterior                    | 0/+                               | 0                                               |
| BLV             | Basolateral Amygdalar nucleus, Ventral                     | ++/+++                            | ++                                              |
| BMA             | Basomedial Amygdalar nucleus, Anterior                     | ++/+++                            | ++                                              |
| D, MDL, MDC, MD | Mediodorsal Thalamic nucleus                               | ++                                | 0                                               |
| PF              | Parafascicular Thalamic nucleus                            | ++                                | 0                                               |
| CM              | Central Medial Thalamic nucleus                            | ++/+++                            | 0                                               |
| PVP             | Paraventricular Thalamic nucleus, Posterior                | +++                               | +                                               |
| PV              | Paraventricular Thalamic nucleus                           | +++                               | 0                                               |
| Po              | Posterior Thalamic nuclear group                           | ++                                | 0                                               |
| SPF             | Subparafascicular Thalamic nucleus                         | +++                               | 0                                               |
| PoMn            | Posteromedian Thalamic nucleus                             | ++                                | 0                                               |
| PHD             | Posterior Hypothalamic Area, Dorsal                        | ++                                | +                                               |
| VMH             | Ventromedial Hypothalamic nucleus                          | ++                                | 0                                               |
| MePD/MePV       | Medial Amygdalar nucleus, posterodorsal and posteroventral | ++                                | ++ (no MePV)                                    |
| Ast             | Amygdalostriatal transition                                | ++                                | ++/+++                                          |
| ns              | nigrostriatal bundle                                       | +++                               | ++/+++                                          |
| DMV             | Dorsomedial Hypothalamic nucleus, Ventral                  | ++                                | 0                                               |
| AHiAL           | Amygdalohippocampal Area, anterolateral                    | ++                                | +/++                                            |
| PVH             | Paraventricular nucleus of the Hypothalamus                | 0/+                               | 0                                               |
| CL              | Centrolateral Thalamic nucleus                             | ++                                | 0                                               |
| PC              | Paracentral Thalamic nucleus                               | ++                                | 0                                               |
| DEN/VEN         | Dorsal and Ventral Endopiriform nucleus                    | +/++                              | +/+++ (VEN); + (DEN)                            |
| LHA             | Lateral Hypothalamus                                       | ++++                              | +++                                             |

| Abbreviation  | Structure                                        | Relative Density of Nts-GFP Cells | Relative Density of Nts-ISH Cells (Allen Brain)      |
|---------------|--------------------------------------------------|-----------------------------------|------------------------------------------------------|
| PeF           | Perifornical nucleus                             | +++                               | ++                                                   |
| CEA           | Central Amygdalar nucleus                        | ++++                              | ++++                                                 |
| ArcD/ArcL     | Arcuate hypothalamic nucleus, Dorsal/<br>Lateral | ++/+++                            | 0                                                    |
| Xi            | Xiphoid Thalamic nucleus                         | ++                                | 0/+                                                  |
| IMD           | Intermediodorsal Thalamic nucleus                | ++/+++                            | NA                                                   |
| DM            | Dorsomedial Hypothalamic nucleus                 | +                                 | 0                                                    |
| PaXi          | Paraxiphoid nucleus of Thalamus                  | ++                                | +                                                    |
| Arc           | Rostral Arcuate Hypothalamic nucleus             | ++++                              | +/++                                                 |
| BMA           | Basomedial Amygdalar nucleus,<br>anterior        | ++/+++                            | 0                                                    |
| PMCo/PLCo/Aco | Cortical Amygdalar nucleus                       | ++/+++                            | +/++                                                 |
| STIA          | ST, intraamygdalar division                      | ++/+++                            | ++/+++                                               |
| CxA           | Cortex-Amygdala Transition                       | ++/+++                            | +/++                                                 |
| AV            | Anteroventral thalamic nucleus                   | +/++                              | 0                                                    |
| RchL          | Retrochiasmatic, Lateral                         | +/++                              | 0                                                    |
| EP/MGP        | Entopeduncular nucleus                           | ++/+++                            | 0                                                    |
| Cpu           | Caudate Putamen                                  | ++/+++                            | ++/+++ in very ventral most region,<br>0/+ elsewhere |
| MeAD          | Medial Amygdalar nucleus,<br>Anterodorsal        | ++/+++                            | 0                                                    |
| AHP           | Anterior Hypothalamic Area, Posterior            | ++/+++                            | 0                                                    |
| Rch           | Retrochiasmatic Area                             | ++                                | 0                                                    |
| ZI            | Zona Incerta                                     | 0/+                               | 0                                                    |
| ZIR           | Zona Incerta, rostral                            | 0/+                               | 0                                                    |
| Py3 CA3       | Pyramidal Field CA3 Hippocampus                  | +                                 | 0                                                    |
| IAD           | Interanterodorsal thalamic nucleus               | +/++                              | 0                                                    |
| IAM           | Interanteromedial thalamic nucleus               | +/++                              | 0                                                    |
| MeAV          | Medial Amygdalar nucleus,<br>Anteroventral       | +++                               | +/++                                                 |
| IM            | Intercalated amygdalar nucleus, main             | ++/+++                            | 0                                                    |
| SO            | Supraoptic nucleus                               | 0/+                               | 0                                                    |
| BAOT          | Bed nucleus Access of the Olfactory tract        | +/++                              | 0                                                    |
| AA            | Anterior amygdalar area                          | ++                                | 0                                                    |

| Abbreviation  | Structure                                                                                            | Relative Density of Nts-GFP Cells | Relative Density of Nts-ISH Cells (Allen Brain) |
|---------------|------------------------------------------------------------------------------------------------------|-----------------------------------|-------------------------------------------------|
| VCI           | Ventral part of the claustrum                                                                        | 0/+                               | 0                                               |
| AM            | Anteromedial thalamic nucleus                                                                        | 0/+                               | 0                                               |
| AHC           | Anterior Hypothalamic Area, Central                                                                  | ++                                | 0/+                                             |
| MCPO          | Magnocellular preoptic nucleus                                                                       | +                                 | 0                                               |
| AVDM          | Anteroventral thalamic nucleus, dorsomedial                                                          | 0/+                               | 0                                               |
| SCh           | Suprachiasmatic nucleus                                                                              | ++                                | ++                                              |
| SM            | nucleus stria medullaris                                                                             | +                                 | 0                                               |
| PVA           | Paraventricular Thalamic nucleus, Anterior                                                           | +++ /++++                         | +++ /++++                                       |
| VA            | Ventral Anterior Thalamic nucleus                                                                    | +                                 | 0                                               |
| AA            | Anterior Amygdalar Area                                                                              | + /++                             | 0                                               |
| VLH           | Ventrolateral hypothalamic nucleus                                                                   | + /++                             | 0                                               |
| ESO           | Episupraoptic nucleus                                                                                | +                                 | 0                                               |
| LA            | Lateroanterior hypothalamic nucleus                                                                  | ++                                | ++ /+++                                         |
| Rt            | Reticular thalamic nucleus                                                                           | +                                 | 0                                               |
| PT            | Paratenial thalamic nucleus                                                                          | +                                 | 0                                               |
| LOT           | nucleus of the Lateral Olfactory tract                                                               | +                                 | 0                                               |
| ANS           | Accessory neurosecretory nucleus                                                                     | +                                 | 0                                               |
| AHA           | Anterior hypothalamic area, anterior                                                                 | + /++                             | +++                                             |
| TS            | Triangular septal nucleus                                                                            | 0/+                               | 0                                               |
| vhc           | Ventral hippocampal commissure                                                                       | 0/+                               | 0                                               |
| BSTMPL/BSTMPI | Bed nucleus of the stria terminalis, medial division, posterolateral part / posterointermediate part | + /++                             | + /++                                           |
| df            | Dorsal fornix                                                                                        | 0/+                               | 0                                               |
| Cg            | Cingulate Cortex                                                                                     | ++++                              | 0                                               |
| EAC/EAM/EA    | Sublenticular extended amygdala                                                                      | ++ /+++                           | 0                                               |
| BSTMPM        | Bed nucleus of the stria terminalis, medial division, posteromedial part                             | 0/+                               | 0                                               |
| HDB           | nucleus of the horizontal limb of the diagonal band                                                  | +                                 | 0                                               |
| GP            | Globus pallidus                                                                                      | 0/+                               | 0                                               |
| BAC           | Bed nucleus of the anterior commissure                                                               | 0/+                               | 0                                               |
| StHy          | Striohypothalamic nucleus                                                                            | +++ /++++                         | ++ /+++                                         |

| Abbreviation | Structure                                                                 | Relative Density of Nts-GFP Cells | Relative Density of Nts-ISH Cells (Allen Brain) |
|--------------|---------------------------------------------------------------------------|-----------------------------------|-------------------------------------------------|
| MPO          | Medial Preoptic nucleus                                                   | ++++                              | +++ /++++                                       |
| MPA          | Medial Preoptic Area                                                      | +++                               | ++ /+++                                         |
| LPO          | Lateral Preoptic nucleus                                                  | +++                               | ++ /+++                                         |
| A14          | A14 Dopamine cells                                                        | ++                                | 0                                               |
| f            | fornix                                                                    | 0/+                               | 0                                               |
| BSTLI        | Bed nucleus of the stria terminalis, lateral division, intermediate part  | ++                                | +                                               |
| Sfi          | Septofimbrial nucleus                                                     | +                                 | 0                                               |
| BSTLP        | Bed nucleus of the stria terminalis, lateral division, posterior part     | ++                                | ++                                              |
| AVPe         | Anteroventral Periventricular nucleus                                     | ++++                              | ++ /+++                                         |
| VMPO         | Ventromedial Preoptic nucleus                                             | +++ /++++                         | +++                                             |
| VLPO         | Ventrolateral Preoptic nucleus                                            | ++ /+++                           | +                                               |
| BSTLV        | Bed nucleus of the stria terminalis, lateral division, ventral part       | + /++                             | ++                                              |
| Tu           | Olfactory tubercle                                                        | +++ /++++                         | +++ /++++                                       |
| BSTLJ        | Bed nucleus of the stria terminalis, lateral division, juxtacapsular part | +                                 | ++                                              |
| BSTMPL       | Bed nucleus of the stria terminalis, medial division, posterolateral part | + /++                             | + /++                                           |
| StA          | Strial part of the Preoptic Area                                          | ++                                | 0                                               |
| BSTLD        | Bed nucleus of the stria terminalis, lateral division, dorsal part        | ++                                | ++++                                            |
| BSTMA        | Bed nucleus of the stria terminalis, medial division, anterior part       | ++ /+++                           | ++ /+++                                         |
| Shy          | Septohypothalamic nucleus                                                 | +++                               | ++                                              |
| PS           | Parastrial nucleus                                                        | +++                               | ++                                              |
| BSTMV        | Bed nucleus of the stria terminalis, medial division, ventral part        | ++ /+++                           | ++ /+++                                         |
| IPAC         | Interstitial nucleus of the posterior limb of the anterior commissure     | +++                               | ++ /+++                                         |
| LSI          | Lateral Septal Nucleus, intermediate part                                 | +++                               | +++ /++++                                       |
| LSD/LSV      | Lateral Septal Nucleus, dorsal / ventral part                             | +++                               | +++ (LSD); +++ /++++ (L)                        |
| AcbC         | Nucleus Accumbens, Core                                                   | *between + and +++                | 0/+                                             |
| SIB          | Substantia innominata                                                     | ++ /+++                           | 0                                               |
| Icj          | Island of Cajella                                                         | ++++                              | +++ /++++                                       |
| AcbSh        | Nucleus Accumbens, Shell                                                  | ++++                              | ++ /+++                                         |
| LAcSh        | Nucleus Accumbens, lateral Shell                                          | +++ /++++                         | +++                                             |



| <b>Abbreviation</b> | <b>Structure</b>                     | <b>Relative Density of Nts-GFP Cells</b> | <b>Relative Density of Nts- ISH Cells (Allen Brain)</b> |
|---------------------|--------------------------------------|------------------------------------------|---------------------------------------------------------|
| ICjM                | Island of Cajella, Major Island      | +++                                      | 0                                                       |
| DTT                 | Dorsal Tenia Tecta                   | ++                                       | 0                                                       |
| PrL                 | Prelimbic Cortex                     | ++                                       | 0                                                       |
| IL                  | Infralimbic Cortex                   | ++                                       | 0                                                       |
| Shi                 | Septohippocampal nucleus             | +++                                      | 0                                                       |
| Nv                  | Navicular Postolfactory nucleus      | ++++                                     | +                                                       |
| VTT                 | Ventral Tenia Tecta                  | ++/+++                                   | 0                                                       |
| AOM                 | Anterior Olfactory Area, Medial Part | ++/+++                                   | 0                                                       |
| MO                  | Medial Orbital Cortex                | + / ++                                   | 0                                                       |
